# Supplementary material
Source: PubMed Central journal article supplement (PMC6741533)
Supplement: jin-0006-0765-s01.pdf [file jin-0006-0765-s01.pdf]

Table S1. NET-associated proteins.

| 2192-induced NET proteome                              |                                                            |                                                |                                                         |                                                   |                               |                                                  |
|--------------------------------------------------------|------------------------------------------------------------|------------------------------------------------|---------------------------------------------------------|---------------------------------------------------|-------------------------------|--------------------------------------------------|
| Metabolic enzymes                                      | Structural Proteins                                        | Nucleosome-Associated Proteins                 | Anti-Microbial Related Proteins                         | Chaperone/Support Proteins                        | Oxidoreductases               | Not Classified                                   |
| *Transaldolase (43%, TALDO1)                           | *Coronin-1A (29%, CORO1A)                                  | *Histone H4 (66%, HIST1H4A)                    | *Lactotransferrin (37%, LTF)                            | *Annexin A1 (48%, ANXA1)                          | *Catalase (29%, CAT)          | Ubiquitin-60S ribosomal protein L40 (14%, UBA52) |
| *Transekolase (41%, TKT)                               | Alpha-actin-2 (27%, ACTA2)                                 | *Histone H2B type 1-A (37%, HIST1H2BA)         | *Leukocyte elastase inhibitor (35%, SERPINB1)           | Annexin A3 (33%, ANXA3)                           | Peroxioredoxin-2 (13%, PRDX2) | *Protein S100-A12 (13%, S100A12)                 |
| *Glucose-6-phosphate isomerase (36%, GPI)              | *Alpha-actinin-1 (26%, ACTN1)                              | *Histone H2B type 1-B (37%, HIST1H2BB)         | *Myeloperoxidase (34%, MPO)                             | Peptidyl-prolyl cis-trans isomerase A (24%, PPIA) |                               | *Resistin (10%, RETN)                            |
| Fructose-bisphosphate aldolase A (30%, ALDOA)          | *Beta-Actin (22%, ACTB)                                    | *Histone H3.1t (37%, HIST3H3)                  | *Neutrophil gelatinase-associated lipocalin (15%, LCN2) | Heat shock cognate 71 kDa protein (14%, HSPA8)    |                               |                                                  |
| Triosephosphate isomerase (29%, TPI1)                  | *Profilin-1 (22%, PFN1)                                    | *Histone H2A type 1-A (25%, HIST1H2AA)         | *Lysozyme C (8%, LYZ)                                   | Heat shock 70 kDa protein 1A/1B (12%, HSPA1A)     |                               |                                                  |
| *Alpha-enolase (27%, ENO1)                             | Myosin light chain 6B (15%, MYL6B)                         | *Histone H2B type 1-J (14%, HIST1H2BJ)         | *Cathelicidin antimicrobial peptide (5%, CAMP)          | Heat shock 70 kDa protein 1 like (11%, HSPA1L)    |                               |                                                  |
| Phosphoglycerate kinase 1 (27%, PGK1)                  | Actin-related protein 2/3 complex subunit 1B (13%, ARPC1B) | *Histone H2A type 1-B/E (13%, HIST1H2AB)       | *Neutrophil elastase (5%, ELANE)                        | *Matrix metalloproteinase-9 (10%, MMP9)           |                               |                                                  |
| *Glyceraldehyde-3-phosphate dehydrogenase (16%, GAPDH) | Gelsolin (13%, GSN)                                        | *Histone H2B type 1-C/E/F/G/I (10%, HIST1H2BC) |                                                         |                                                   |                               |                                                  |
| L-lactate dehydrogenase B chain (12%, LDHB)            | *Alpha-actinin-4 (11%, ACTN4)                              | *Histone H3.1 (10%, HIST1H3A)                  |                                                         |                                                   |                               |                                                  |
| L-lactate dehydrogenase A chain (10%, LDHA)            | *Moesin (11%, MSN)                                         |                                                |                                                         |                                                   |                               |                                                  |
|                                                        | *Actin-related protein 3 (10%, ACTR3)                      |                                                |                                                         |                                                   |                               |                                                  |
|                                                        | F-actin-capping protein subunit alpha-1 (10%, CAPZA1)      |                                                |                                                         |                                                   |                               |                                                  |

| PAO1-induced NET proteome                     |                           |                                                |                                              |                                                       |                               |                                   |
|-----------------------------------------------|---------------------------|------------------------------------------------|----------------------------------------------|-------------------------------------------------------|-------------------------------|-----------------------------------|
| Metabolic enzymes                             | Structural Proteins       | Nucleosome-Associated Proteins                 | Anti-Microbial Related Proteins              | Chaperone/Support Proteins                            | Oxidoreductases               | Not Classified                    |
| *Phosphoglycerate mutase 1 (41%, PGAM1)       | *Coronin-1A (18%, CORO1A) | *Histone H4 (67%, HIST1H4A)                    | Proteasome subunit alpha type-1 (17%, PSMA1) | 10 kDa heat shock protein, mitochondrial (43%, HSP61) | *Catalase (17%, CAT)          | Ferritin light chain (38%, FTL)   |
| *Transaldolase (35%, TALDO1)                  | *Beta-Actin (13%, ACTB)   | *Histone H3.1t (49%, HIST3H3)                  | *Myeloperoxidase (16%, MPO)                  | Peptidyl-prolyl cis-trans isomerase A (32%, PPIA)     | Thioredoxin (11%, PDI3)       | 14-3-3 protein gamma (10%, YWHAG) |
| Triosephosphate isomerase (31%, TPI1)         |                           | *Histone H2B type 1-A (37%, HIST1H2BA)         | *Lysozyme C (14%, LYZ)                       | Heat shock 70 kDa protein 1 like (12%, HSPA1L)        | Peroxioredoxin-1 (10%, PRDX1) | Ferritin heavy chain (7%, FTH1)   |
| *Transekolase (30%, TKT)                      |                           | *Histone H2B type 1-B (37%, HIST1H2BB)         |                                              | 78 kDa glucose-regulated protein (16%, HSPA5)         |                               |                                   |
| Malate dehydrogenase, cytoplasmic (21%, MDH1) |                           | *Histone H2A type 1-B/E (28%, HIST1H2AB)       |                                              | Annexin A5 (16%, ANXA5)                               |                               |                                   |
| Phosphoglycerate kinase 1 (20%, PGK1)         |                           | *Histone H2A type 1-A (14%, HIST1H2AA)         |                                              |                                                       |                               |                                   |
| L-lactate dehydrogenase B chain (17%, LDHB)   |                           | Histone H1.1 (13%, HIST1H1A)                   |                                              |                                                       |                               |                                   |
| *Glucose-6-phosphate isomerase (16%, GPI)     |                           | *Histone H2A type 1-D (13%, HIST1H2AD)         |                                              |                                                       |                               |                                   |
| *Alpha-enolase (14%, ENO1)                    |                           | Histone H1.2 (10%, HIST1H1C)                   |                                              |                                                       |                               |                                   |
| Fructose-bisphosphate aldolase A (14%, ALDOA) |                           | *Histone H2B type 1-C/E/F/G/I (10%, HIST1H2BC) |                                              |                                                       |                               |                                   |
| L-lactate dehydrogenase A chain (11%, LDHA)   |                           | *Histone H3.1 (10%, HIST1H3A)                  |                                              |                                                       |                               |                                   |

| PA581-induced NET proteome                      |                            |                                                |                                              |                                                       |                                          |                                                                              |
|-------------------------------------------------|----------------------------|------------------------------------------------|----------------------------------------------|-------------------------------------------------------|------------------------------------------|------------------------------------------------------------------------------|
| Metabolic enzymes                               | Structural Proteins        | Nucleosome-Associated Proteins                 | Anti-Microbial Related Proteins              | Chaperone/Support Proteins                            | Oxidoreductases                          | Not Classified                                                               |
| *Phosphoglycerate mutase 1 (43%, PGAM1)         | *Coronin-1A (20%, CORO1A)  | *Histone H4 (79%, HIST1H4A)                    | Proteasome subunit alpha type-1 (16%, PSMA1) | Peptidyl-prolyl cis-trans isomerase A (40%, PPIA)     | *Catalase (18%, CAT)                     | Protein disulfide-isomerase A3 (21%, PDI3)                                   |
| *Transaldolase (37%, TALDO1)                    | *Profilin-1 (20%, PFN1)    | *Histone H3.1t (39%, HIST3H3)                  | *Lysozyme C (15%, LYZ)                       | 10 kDa heat shock protein, mitochondrial (25%, HSP61) | Peroxioredoxin-1 (14%, PRDX1)            | 14-3-3 protein epsilon (20%, YWHAE)                                          |
| Phosphoglycerate kinase 1 (36%, PGK1)           | Alpha-actin-2 (19%, ACTA2) | *Histone H2B type 1-A (37%, HIST1H2BA)         | *Myeloperoxidase (15%, MPO)                  | Heat shock cognate 71 kDa protein (22%, HSPA8)        | Superoxide dismutase [Cu-Zn] (11%, SOD1) | 14-3-3 protein beta/alpha (16%, YWHA8)                                       |
| *Transekolase (35%, TKT)                        |                            | *Histone H2B type 1-B (37%, HIST1H2BB)         |                                              | 78 kDa glucose-regulated protein (16%, HSPA5)         | Thioredoxin (11%, PDI3)                  | Protein SET (15%, SET)                                                       |
| Triosephosphate isomerase (31%, TPI1)           |                            | *Histone H2A type 1-B/E (28%, HIST1H2AB)       |                                              | Annexin A5 (15%, ANXA5)                               |                                          | Ubiquitin-60S ribosomal protein L40 (14%, UBA52)                             |
| Fructose-bisphosphate aldolase A (29%, ALDOA)   |                            | *Histone H2A type 1-A (14%, HIST1H2AA)         |                                              |                                                       |                                          | Acidic leucine-rich nuclear phosphoprotein 32 family member A (10%, ANIP32A) |
| *Alpha-enolase (25%, ENO1)                      |                            | Histone H1.1 (13%, HIST1H1A)                   |                                              |                                                       |                                          | N-alpha-acetyltransferase 38, NatC auxiliary subunit (10%, NAA38)            |
| L-lactate dehydrogenase B chain (20%, LDHB)     |                            | *Histone H2A type 1-D (13%, HIST1H2AD)         |                                              |                                                       |                                          | Protein S100-A4 (10%, S100A4)                                                |
| *Glucose-6-phosphate isomerase (17%, GPI)       |                            | *Histone H2B type 1-C/E/F/G/I (10%, HIST1H2BC) |                                              |                                                       |                                          | Rho GDP-dissociation inhibitor 2 (10%, ARHGDI2)                              |
| Malate dehydrogenase, cytoplasmic (16%, MDH1)   |                            | *Histone H3.1 (10%, HIST1H3A)                  |                                              |                                                       |                                          |                                                                              |
| Malate dehydrogenase, mitochondrial (13%, MDH2) |                            |                                                |                                              |                                                       |                                          |                                                                              |
| L-lactate dehydrogenase A chain (10%, LDHA)     |                            |                                                |                                              |                                                       |                                          |                                                                              |
